# Supplementary material
Source: PubMed Central journal article supplement (PMC3499079)
Supplement: supp_kfs191_toxsci-12-0218-File003.pdf [file supp_kfs191_toxsci-12-0218-File003.pdf]

## **SUPPLEMENTAL DATA**

### **AMELIORATION OF METAL-INDUCED TOXICITY IN CAENORHABDITIS ELEGANS: UTILITY OF CHELATING AGENTS IN THE BIOREMEDIATION OF METALS**

By

James M. Harrington<sup>1</sup>, Windy A. Boyd<sup>2</sup>, Marjolein V. Smith,<sup>3</sup> Julie R. Rice<sup>2</sup>, Jonathan H.  
Freedman<sup>2,4\*</sup>, and Alvin L. Crumbliss<sup>1\*</sup>

From <sup>1</sup>Department of Chemistry, Duke University, Durham, NC, USA, <sup>2</sup>Biomolecular  
Screening Branch, National Toxicology Program, Research Triangle Park, NC, USA, and <sup>3</sup>SRA  
International, Inc, Durham, NC, USA, <sup>4</sup>Laboratory of Molecular Toxicology, National Institute  
of Environmental Health Sciences, NIH, Research Triangle Park, NC, USA

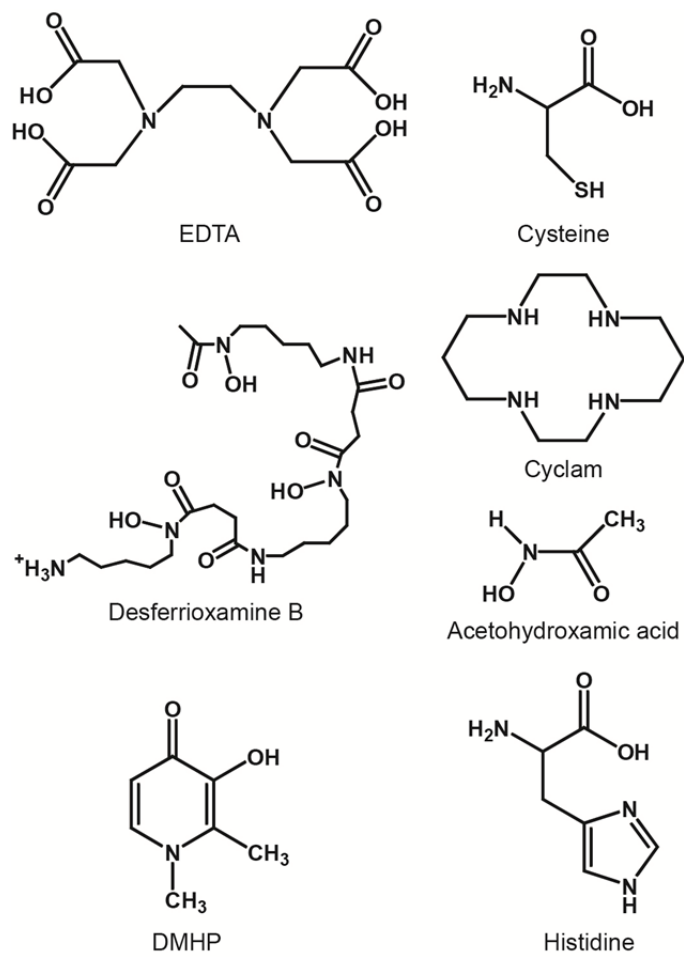

**Figure S1.** Chemical structures of the chelating agents used in this study.

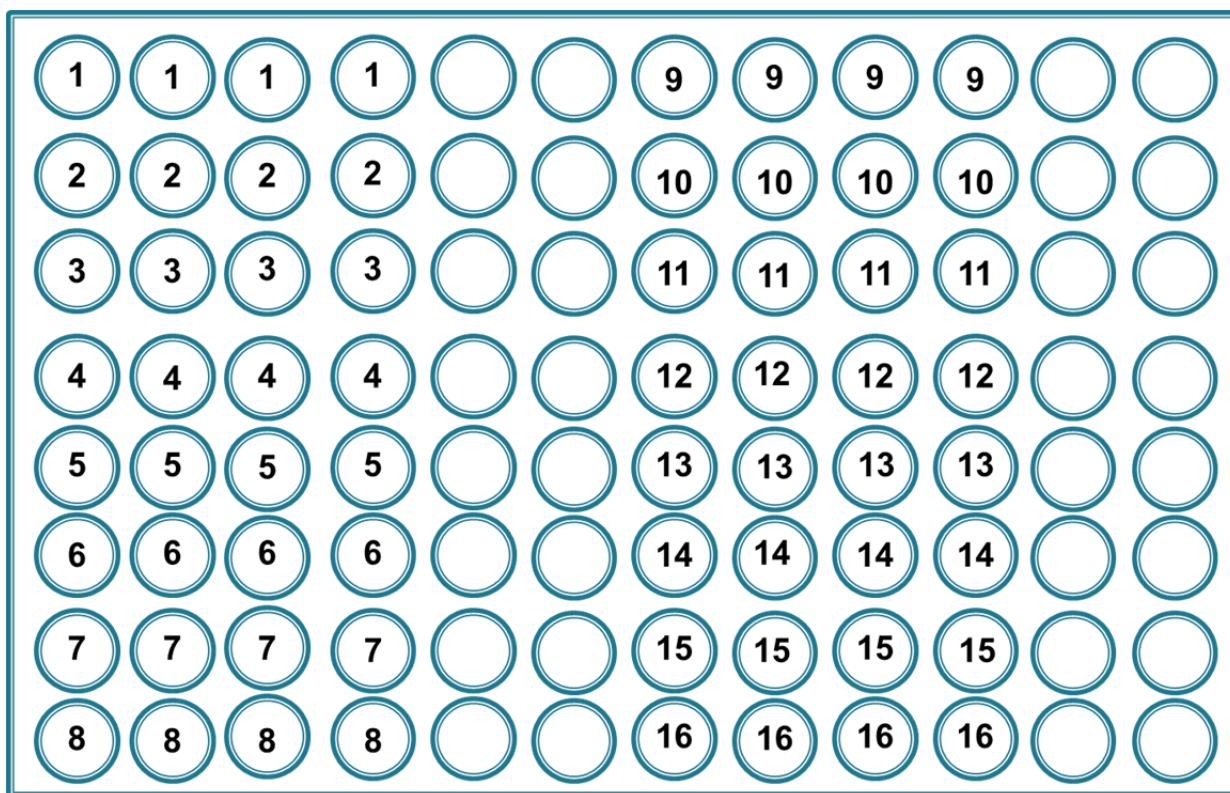

**Figure S2.** Diagram of metal-chelator assay plate design. Legend: 1 – Control wells; 2 – Treatment by acetohydroxamic acid; 3 – Treatment by cysteine; 4 – Treatment by cyclam; 5 – Treatment by DMHP; 6 – Treatment by desferrioxamine B; 7 – Treatment by EDTA; 8 – Treatment by histidine; 9 – Treatment by metal alone; 10 – Treatment by metal and acetohydroxamic acid; 11 – Treatment by metal and cysteine; 12 – Treatment by metal and cyclam; 13 – Treatment by metal and DMHP; 14 – Treatment by metal and desferrioxamine B; 15 – Treatment by metal and EDTA; 16 – Treatment by metal and histidine; blank circles represent rinse wells filled with deionized water.

**TABLE S1**  
**pM values of metal-chelators complexes<sup>a</sup>**

| Chelator          | Metal        |        |        |      |
|-------------------|--------------|--------|--------|------|
|                   | Cadmium      | Copper | Nickel | Zinc |
| AHA               | 6.00         | 7.20   | 6.03   | 6.03 |
| Cyclam            | 11.8         | 6.41   | 6.01   | 6.01 |
| Cysteine          | 6.03         | 21.6   | 13.6   | 9.06 |
| DMHP              | <sup>b</sup> | 10.4   | 6.09   | 6.17 |
| Desferrioxamine B | 6.00         | 11.5   | 6.38   | 6.77 |
| CaEDTA            | 14.6         | 15.4   | 16.7   | 14.7 |
| Histidine         | 6.01         | 9.73   | 7.63   | 6.09 |

<sup>a</sup> pM values represent the negative log of the free uncomplexed metal concentration at the following conditions:  $[M]_{\text{tot}} = 10^{-6}$  M,  $[L]_{\text{tot}} = 10^{-5}$  M, pH = 7.4, T = 25 °C,  $\mu = 0.10$  M .(3)

<sup>b</sup>Stability constants for the Cd-DMHP system have yet to be characterized.

### **Speciation diagrams for the metal-ligand systems in this study in aqueous environments**

Speciation diagrams were calculated for metal-ligand systems using stability constants obtained from the IUPAC Stability Constant Database using the program, HySS by Protonic Software.<sup>1,2</sup> Speciation diagrams were calculated at a constant pH and metal ion concentration, which are noted above each section of speciation diagrams, and varying ligand concentration. Speciation diagrams represent the relative amount of each metal that will be present in any form of complex (plotted on the vertical axis as relative percent total metal concentration) while varying the conditions of the system. In these speciation diagrams, the concentration of the metal and the system pH are kept constant, while the concentration (M) of the ligand present in solution is varied (horizontal axis).

Conditions: pH 6.5, 350  $\mu\text{M}$   $\text{Cd}^{2+}$

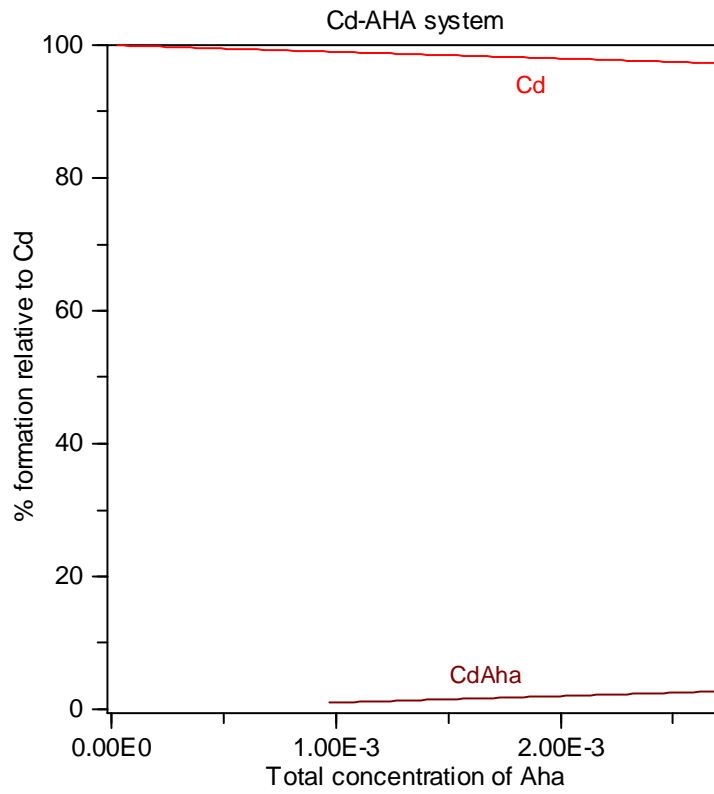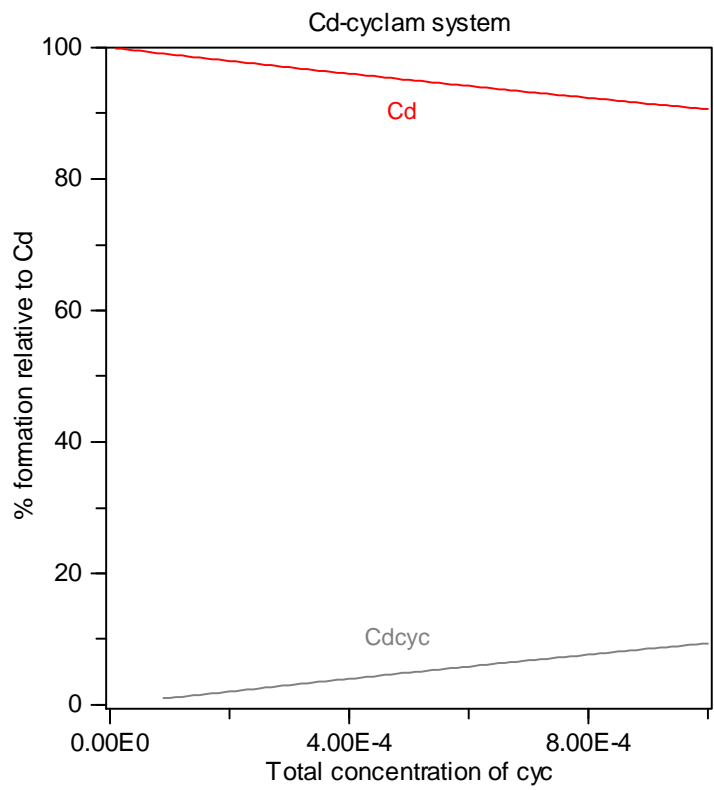

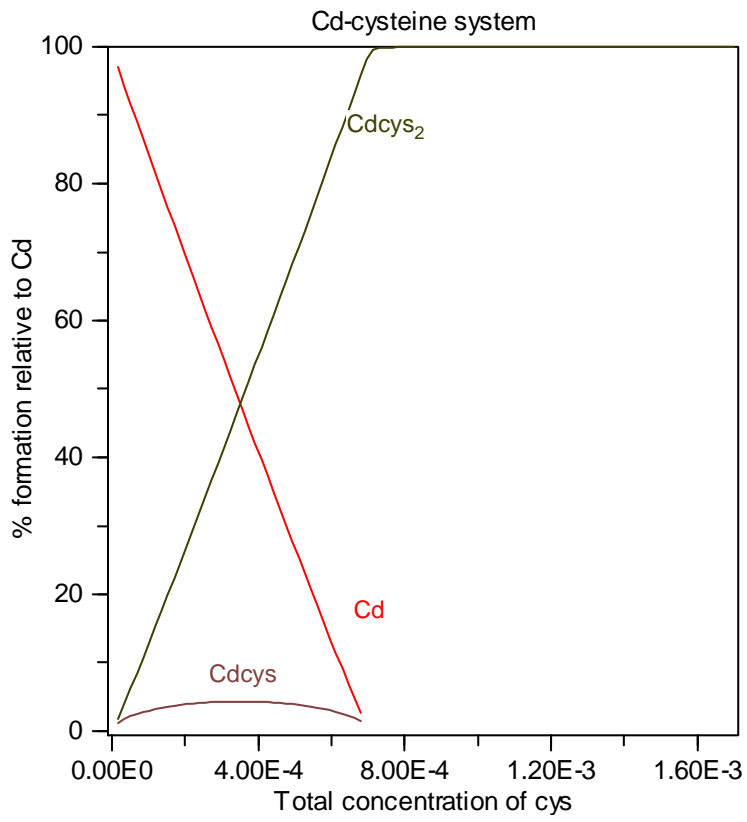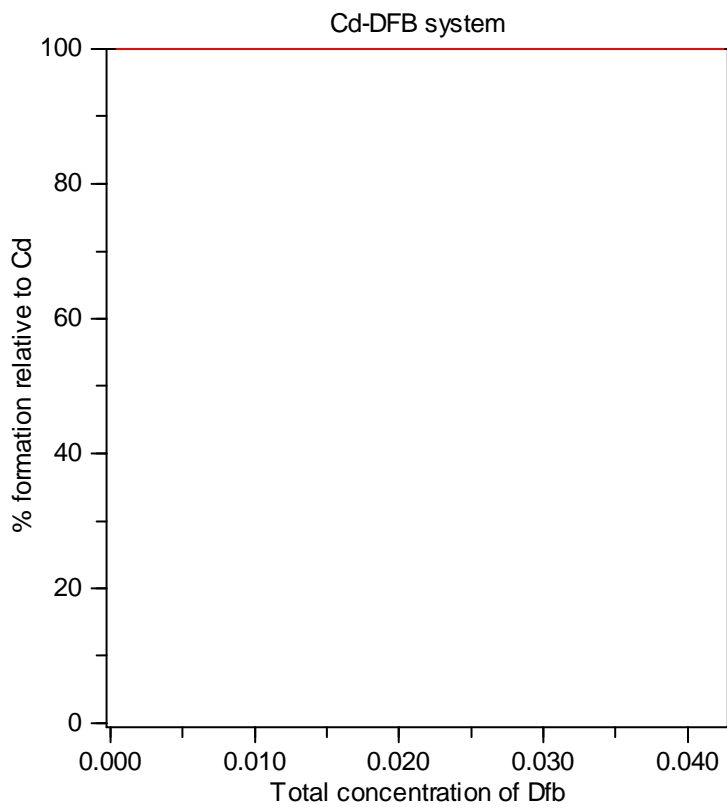

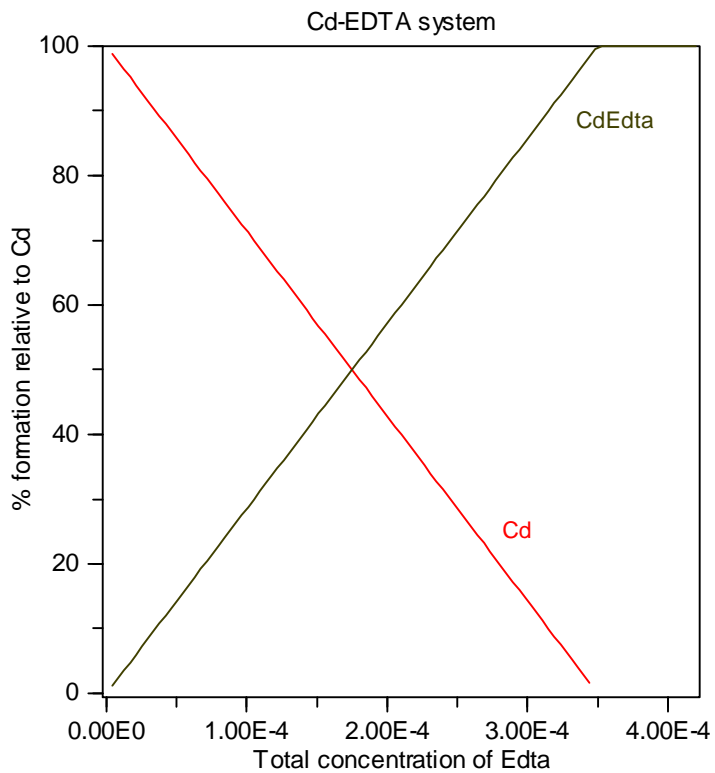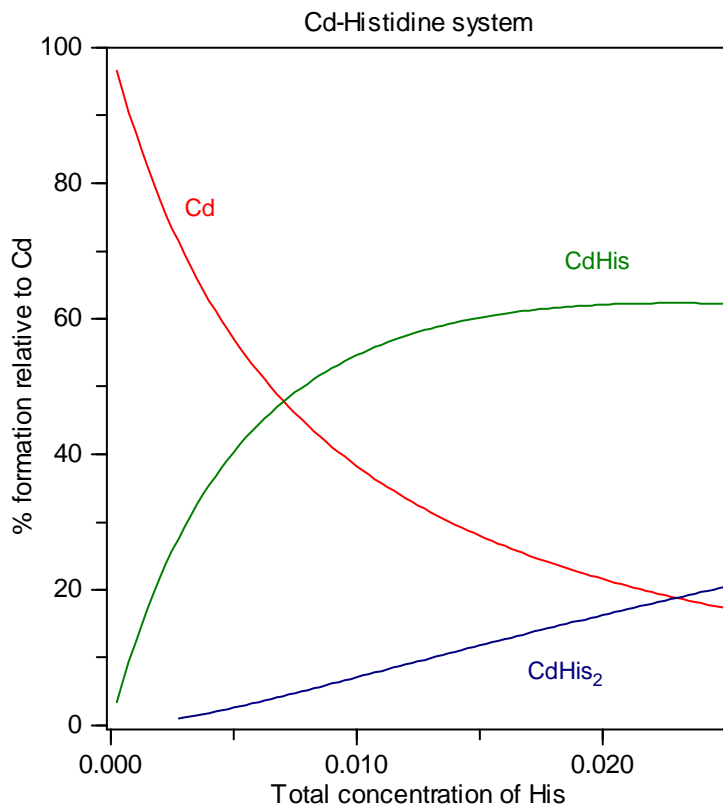



Conditions:  $pH\ 6.5$ ,  $79\ \mu M\ Cu^{2+}$

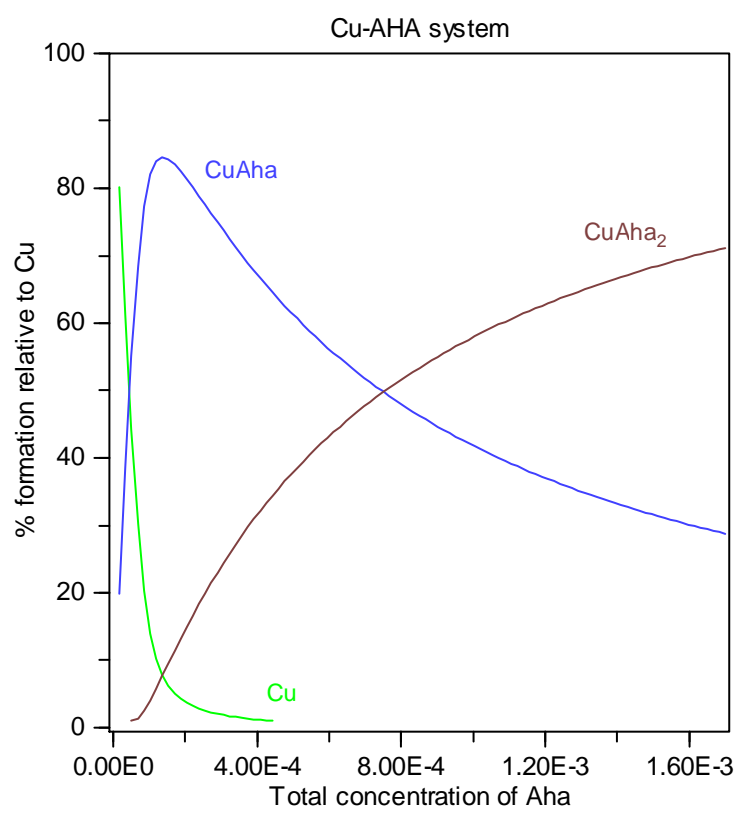

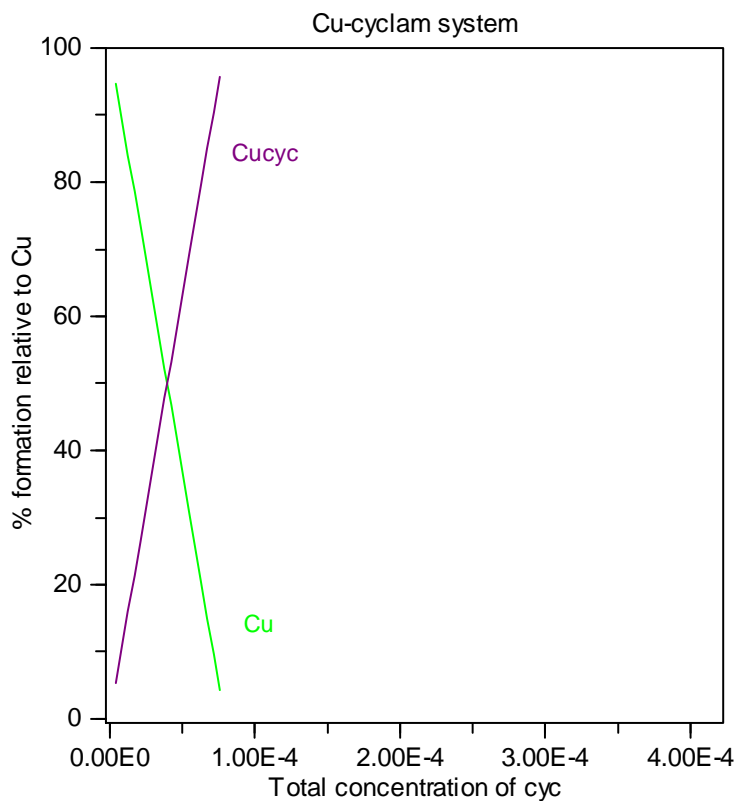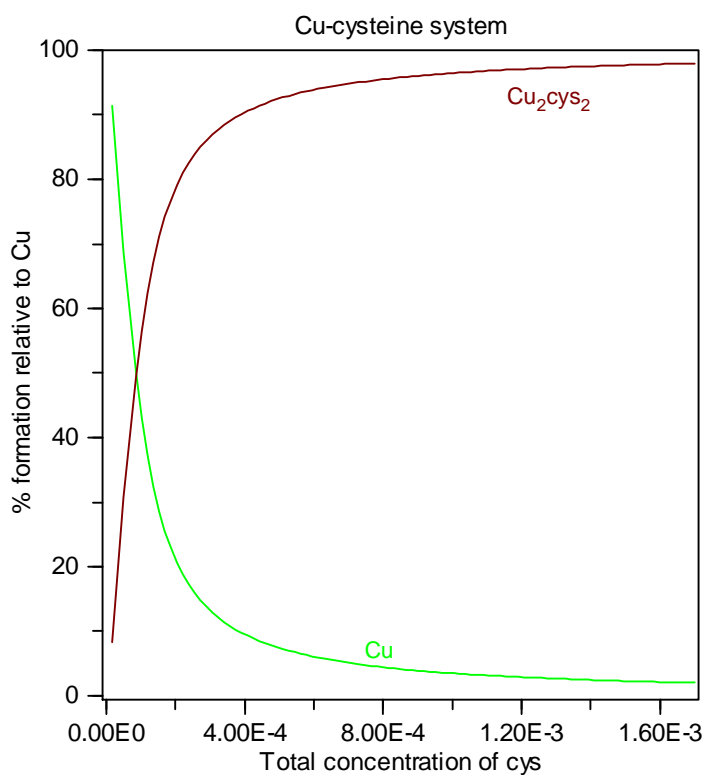

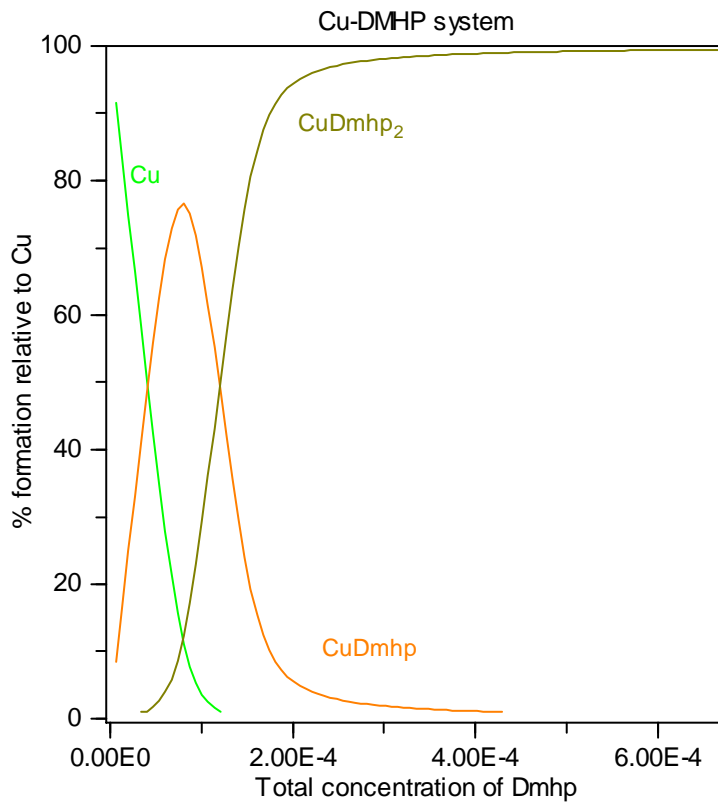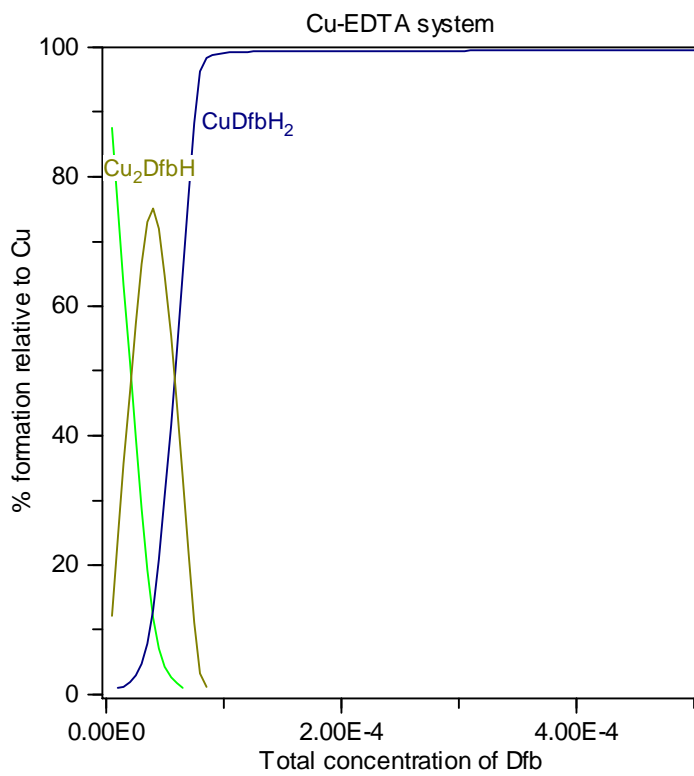

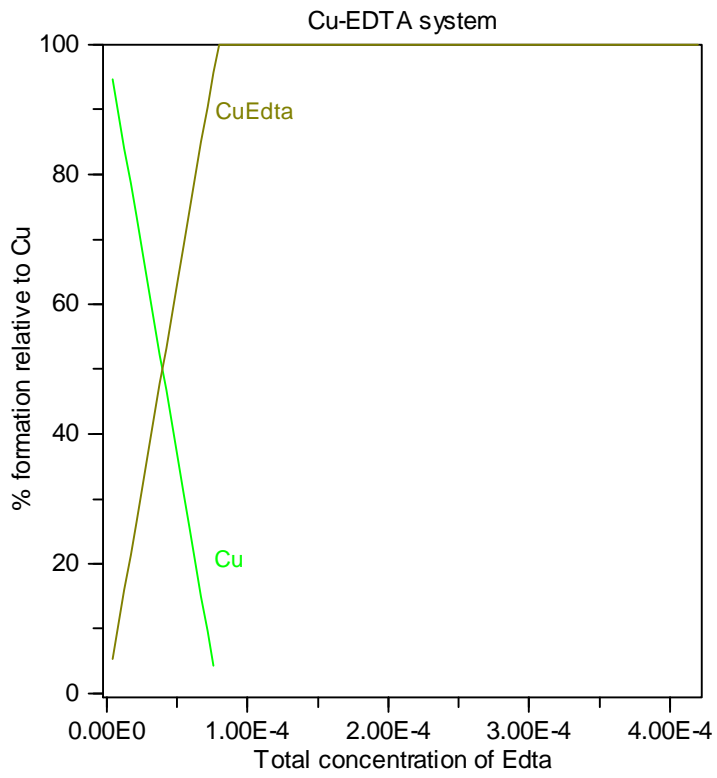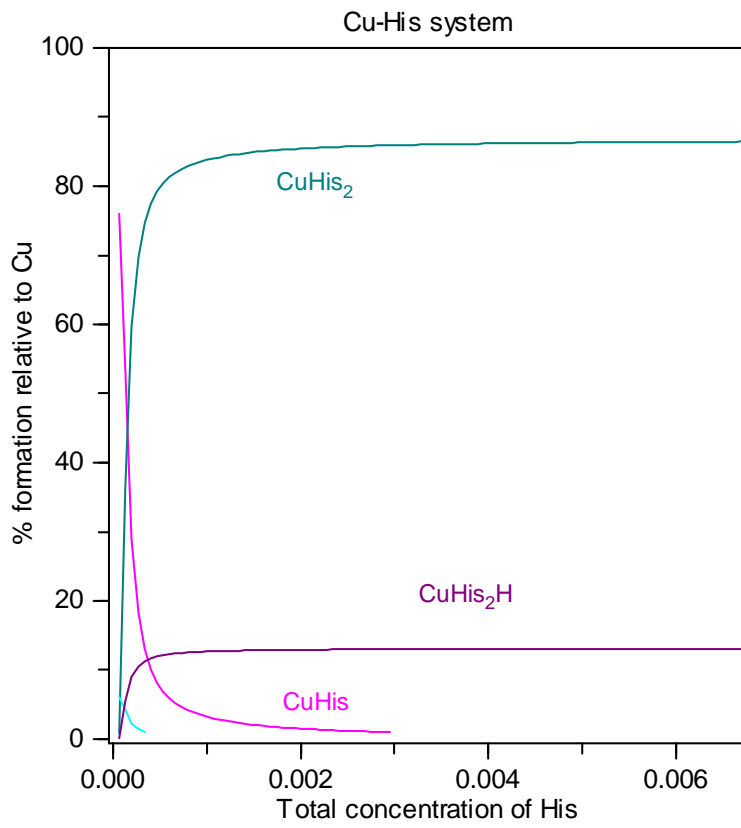



Conditions: pH 6.5, 200  $\mu\text{M}$   $\text{Zn}^{2+}$

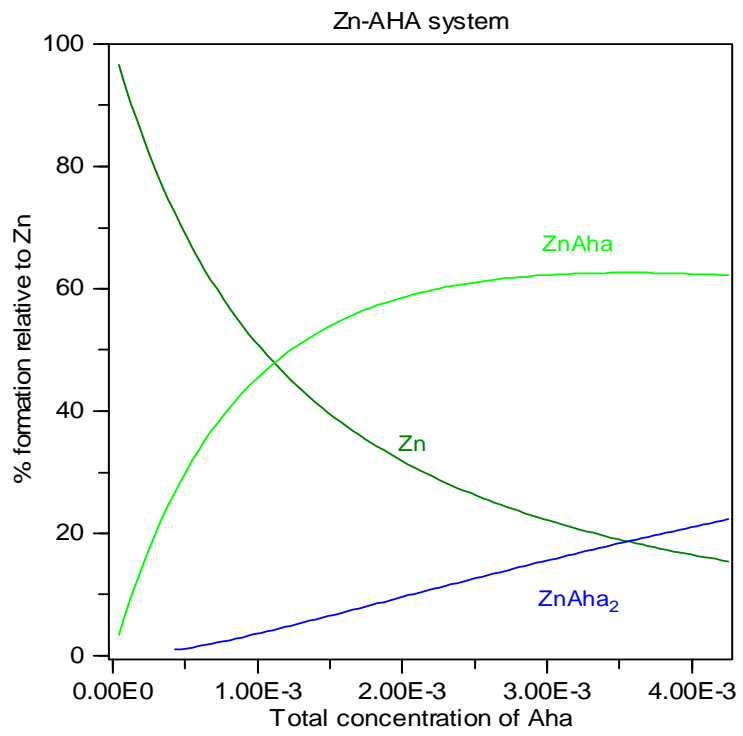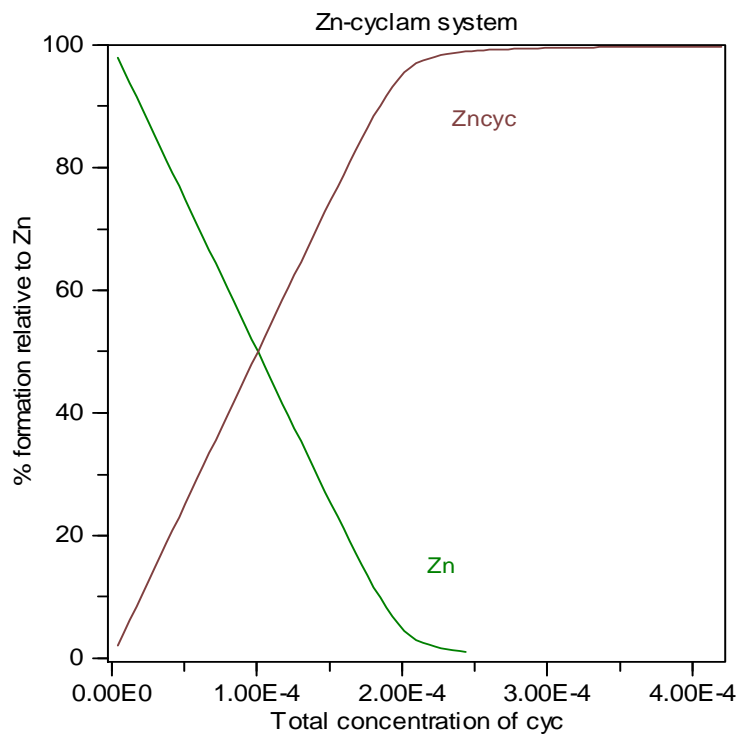

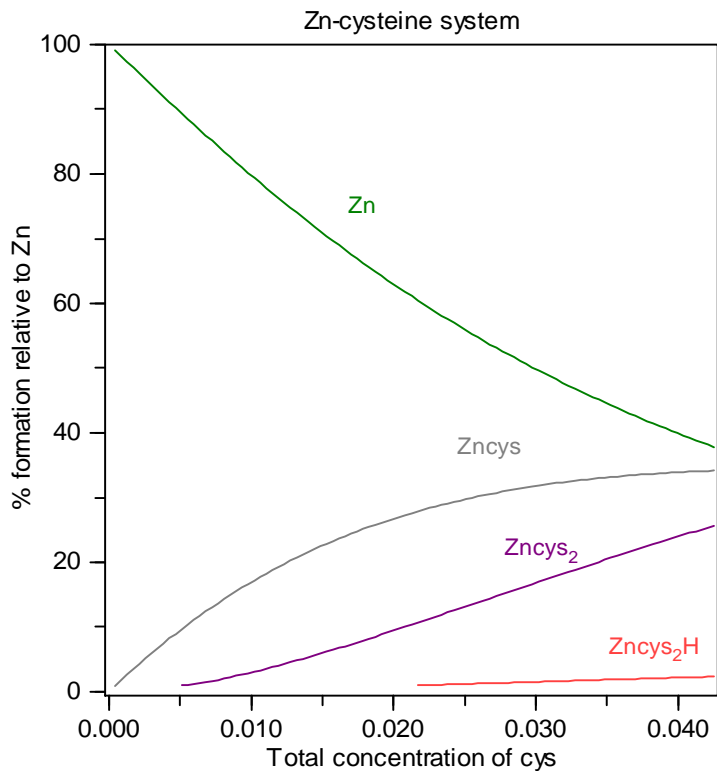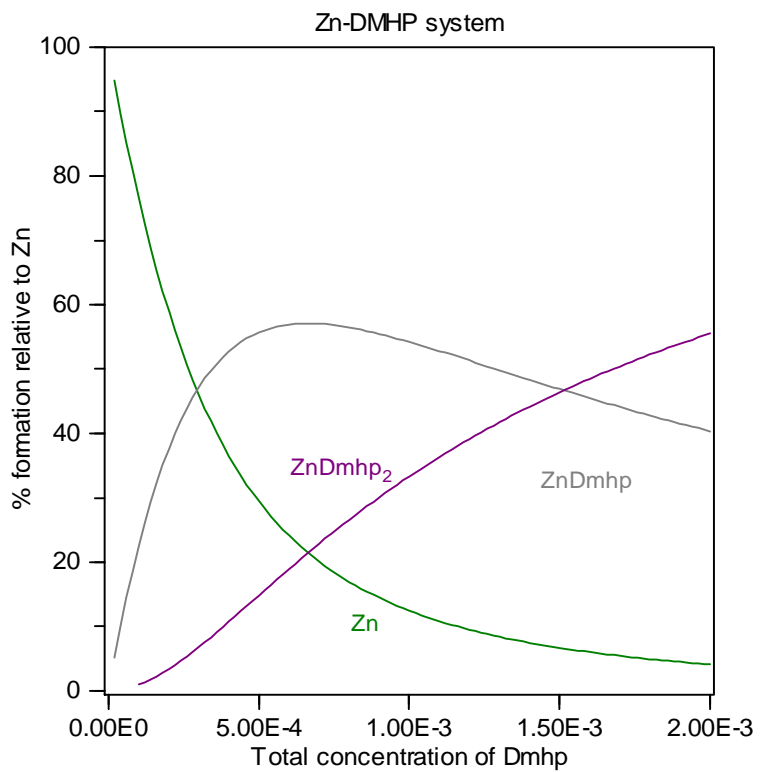

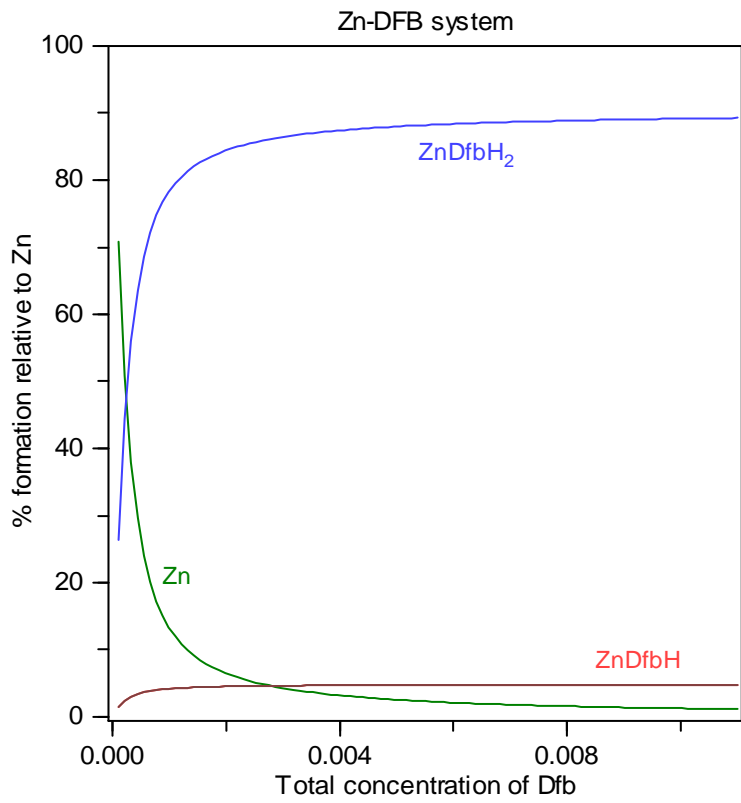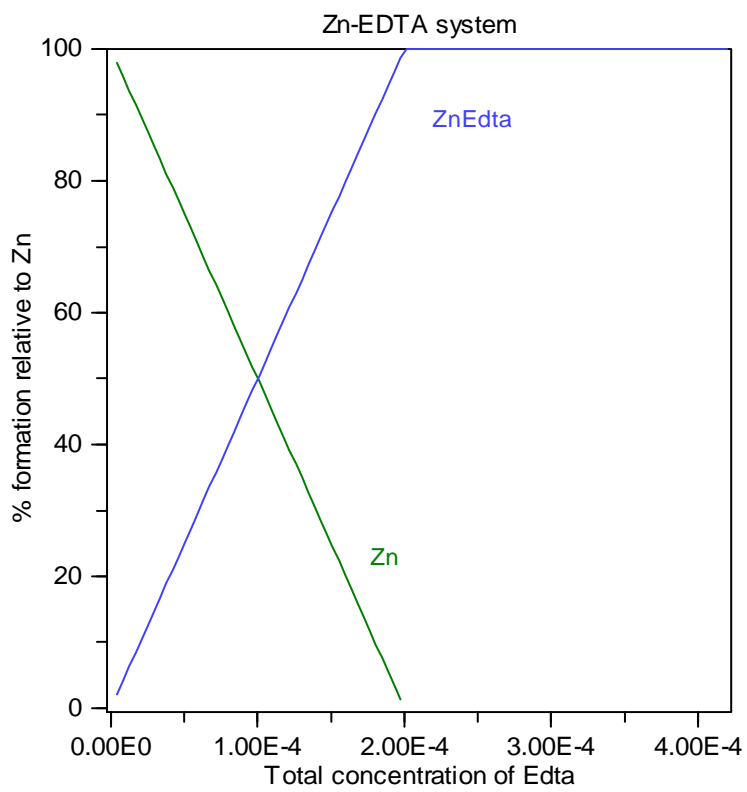



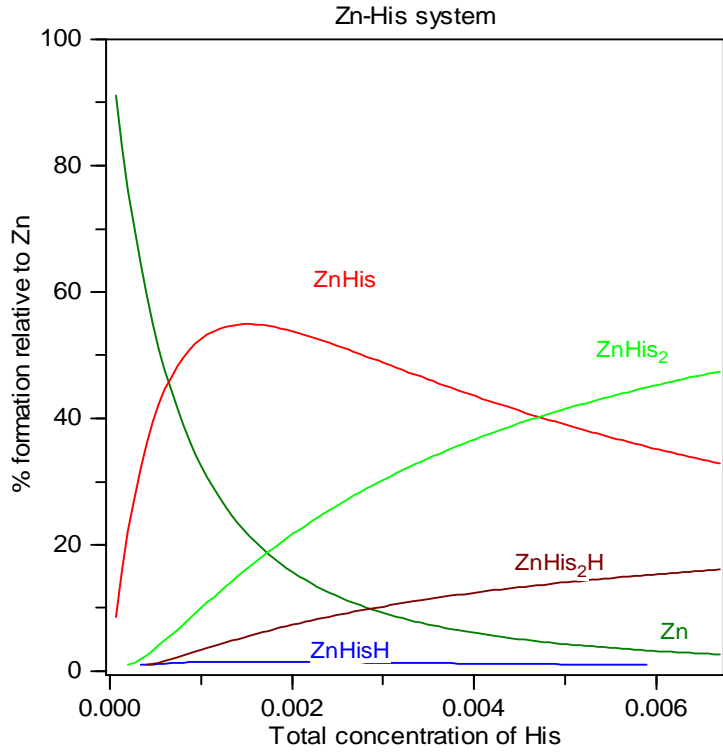

Conditions: pH 6.5, 200  $\mu\text{M}$   $\text{Ni}^{2+}$

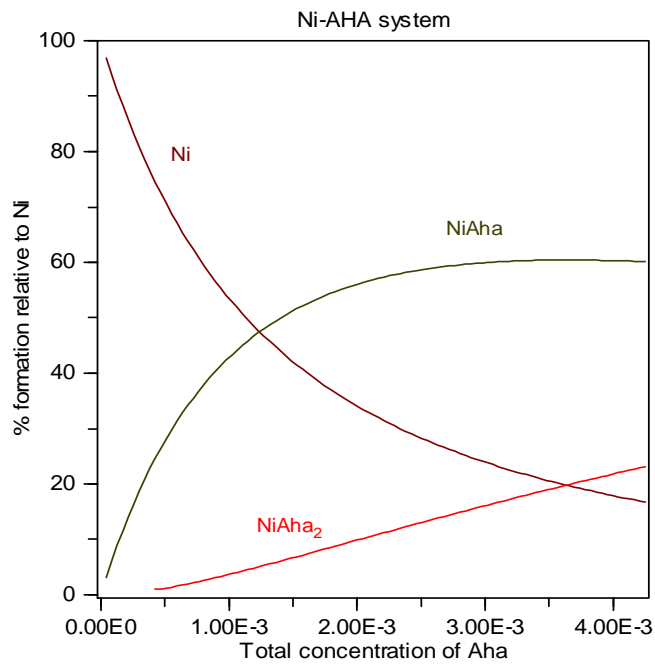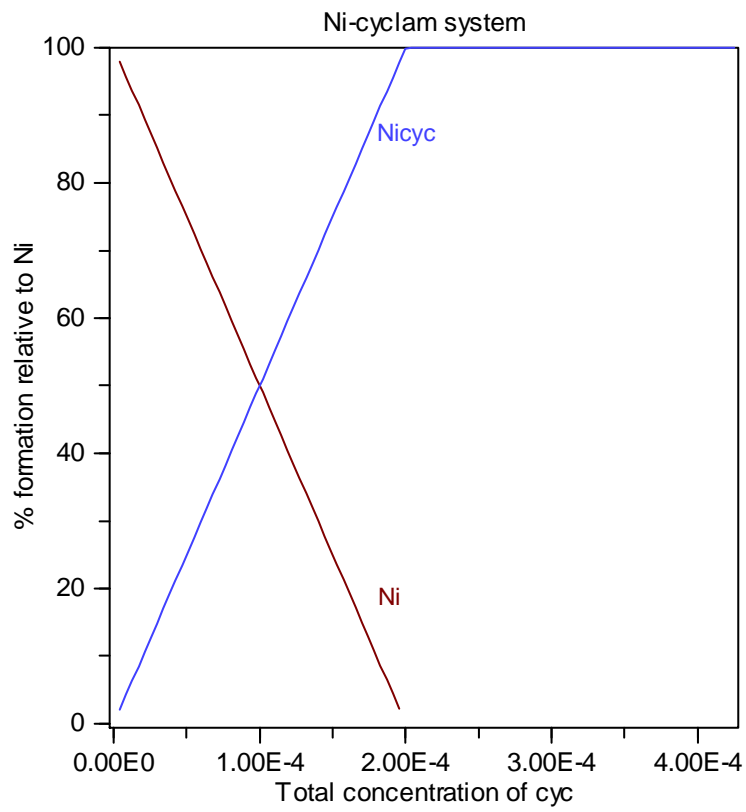

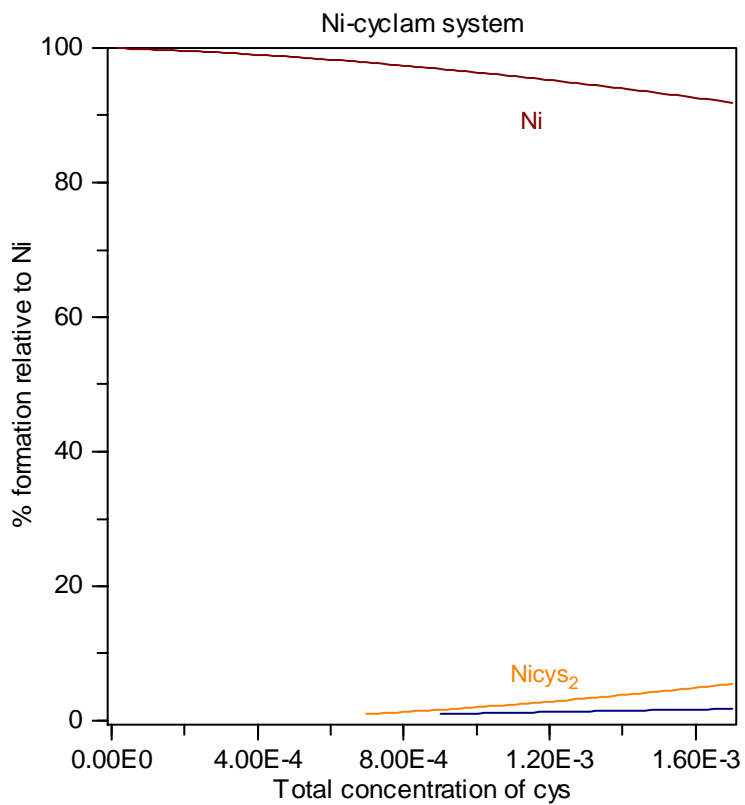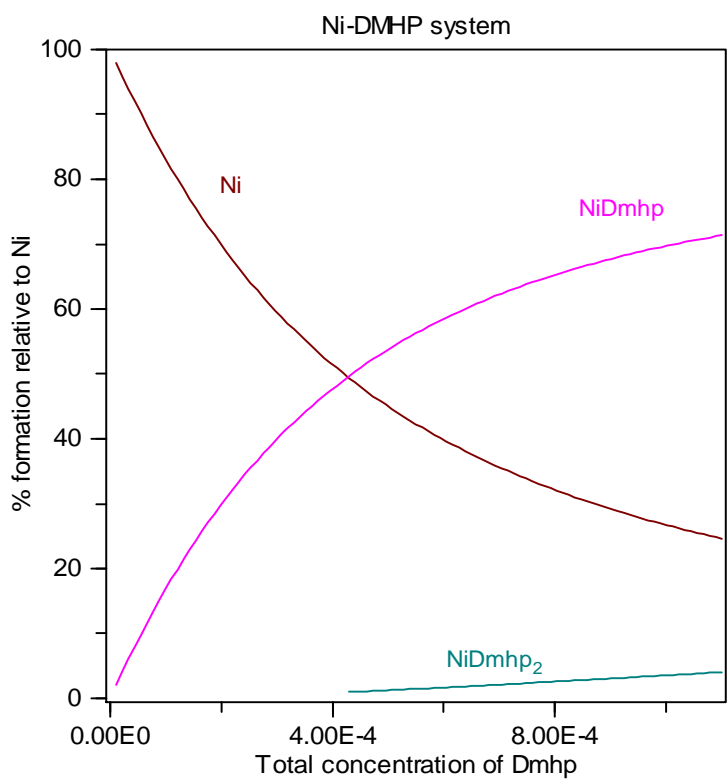

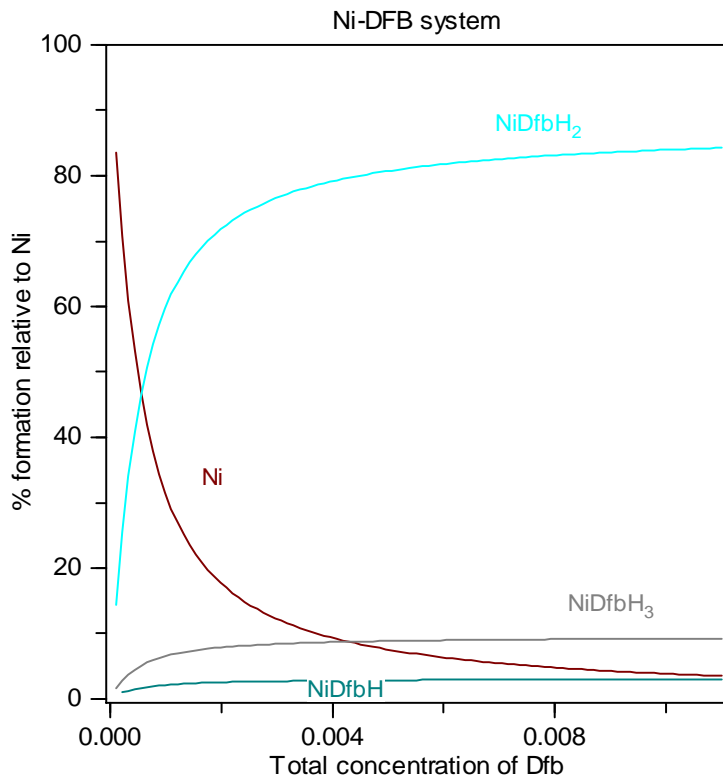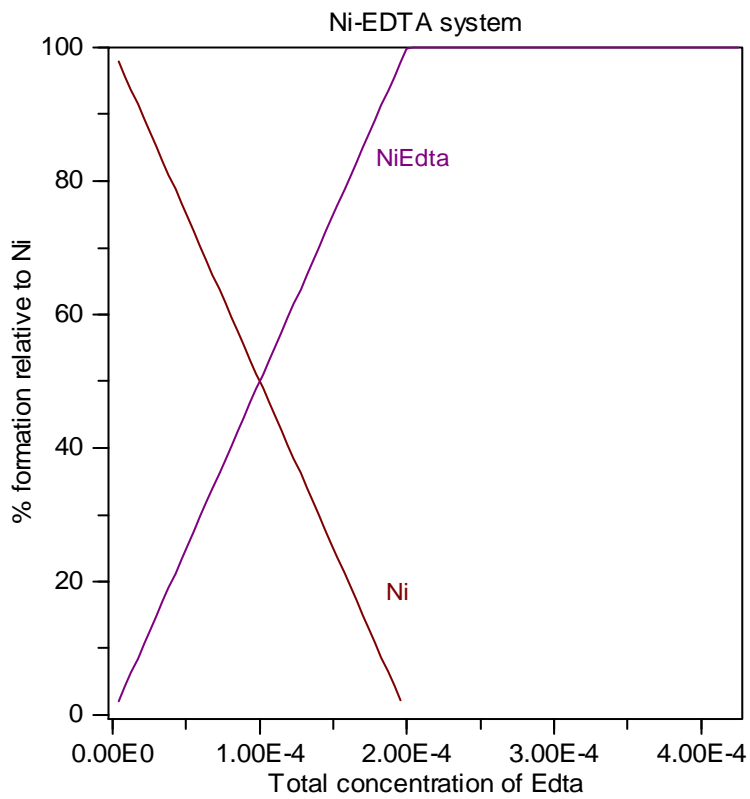

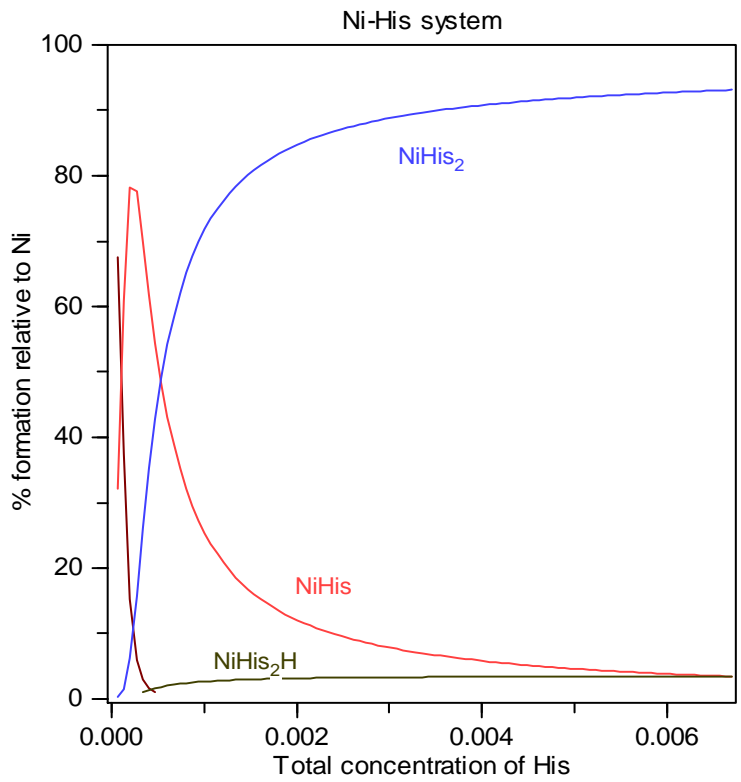

## References

- (1) Alderighi, L.; Gans, P.; Ienco, A.; Peters, D.; Sabatini, A.; Vacca, A. *Coord. Chem. Rev.* **1999**, *184*, 311-318.
- (2) Powell, K. J.; Academic Software: Timble, Otley, Yorks, UK.
- (3) Harris WR, Carrano CJ, Raymond KN. 1979. Coordination chemistry of microbial iron transport compounds. 16. Isolation, characterization, and formation constants of ferric aerobactin. *J Am Chem Soc* 101: 2722-2727.
